# Supplementary material
Source: HighWire-hosted journal article supplement (https://www.cmaj.ca/highwire/filestream/57657/field_highwire_adjunct_files/0/cancer-barbera-1-at.pdf)
Supplement: cancer-barbera-1-at.pdf [file cancer-barbera-1-at.pdf]

**Appendix 1 (as supplied by the authors):** Diagnostic labels used in the study and their corresponding ICD codes

| Study diagnosis name                        | ICD 9 | ICD 10 |
|---------------------------------------------|-------|--------|
| Abdominal pain                              | 7890  | R100   |
| Abdominal pain                              |       | R101   |
| Abdominal pain                              |       | R102   |
| Abdominal pain                              |       | R103   |
| Abdominal pain                              |       | R104   |
| Abnormal lung imaging                       | 7931  | R91    |
| Altered level of consciousness              | 7800  | F059   |
| Altered level of consciousness              |       | R400   |
| Altered level of consciousness              |       | R401   |
| Altered level of consciousness              |       | R4029  |
| Altered level of consciousness              |       | R410   |
| Altered level of consciousness              |       | R4180  |
| Altered level of consciousness              |       | R4188  |
| Altered level of consciousness              |       | R42    |
| Altered level of consciousness              |       | R451   |
| Altered level of consciousness              |       | R470   |
| Altered level of consciousness              |       | R478   |
| Anemia                                      | 2859  | D649   |
| Anemia                                      |       | D630   |
| Anemia                                      |       | D638   |
| Ascites                                     | 7895  | R18    |
| Atrial fibrillation and/or flutter          | 4273  | I480   |
| Attention to surgical dressings and sutures | V583  | Z480   |
| Back pain                                   | 723   | M43    |
| Back pain                                   | 724   | M48    |
| Back pain                                   |       | M53    |
| Back pain                                   |       | M54    |
| Blood transfusion                           | V582  | Z513   |
| Bone metastases                             | 1985  | C795   |
| Brain mets                                  | 1983  | C793   |
| Breast cancer                               | 174   | C50    |
| Cachexia                                    | 7994  | R64    |
| Cardiac arrest                              | 4275  | I46    |
| Chemotherapy                                | V581  | Z511   |
| Chemotherapy                                | V073  | Z512   |
| Chemotherapy                                |       | Z292   |
| Chest pain                                  | 7865  | R071   |
| Chest pain                                  |       | R072   |
| Chest pain                                  |       | R073   |
| Chest pain                                  |       | R074   |
| CNS neoplasm                                | C71   | 191    |
| Colon ca                                    | 153   | C18    |
| Congestive Heart Failure                    | 428   | I50    |
| Constipation                                | 5640  | K590   |

**Appendix to:** Barbera L, Taylor C, Dudgeon D. Why do cancer patients visit the emergency department near the end of life? *CMAJ* 2010. DOI:10.1503/cmaj.091187.

|                                                             |      |       |
|-------------------------------------------------------------|------|-------|
| Convalescence after treatment                               | V66  | Z54   |
| Convulsions                                                 | 7803 | R568  |
| COPD                                                        | 490  | J40   |
| COPD                                                        | 491  | J41   |
| COPD                                                        | 496  | J42   |
| COPD                                                        |      | J44   |
| Dehydration                                                 | 2765 | E860  |
| Dehydration                                                 |      | E868  |
| Dyspnea                                                     | 7860 | R060  |
| Epistaxis                                                   | 7847 | R040  |
| Esophageal cancer                                           | 150  | C15   |
| Fever                                                       | 7806 | R500  |
| Fever                                                       |      | R501  |
| Fever                                                       |      | R509  |
| Fitting and adjustment of urinary device                    | V536 | Z466  |
| FU examination after treatment                              | V67  | Z08   |
| FU examination after treatment                              |      | Z09   |
| GI hemorrhage                                               | 5789 | K922  |
| Headache                                                    | 7840 | R51   |
| Hematuria                                                   | 5997 | R31   |
| Hemoptysis                                                  | 7863 | R042  |
| Hemoptysis                                                  |      | R048  |
| Hemoptysis                                                  |      | R049  |
| Intestinal obstruction                                      | 5609 | K566  |
| Issue repeat prescription                                   | V681 | Z760  |
| Jaundice                                                    | 7824 | R17   |
| Laboratory examination (no reported complaint or diagnosis) | V726 | Z017  |
| Lung cancer                                                 | 162  | C34   |
| Lung metastases                                             | 1970 | C780  |
| Lung metastases                                             |      | C782  |
| Malaise and Fatigue                                         | 7807 | R53   |
| Malignant neoplasm unspecified site                         | 199  | C80   |
| Multiple myeloma                                            | 203  | C90   |
| Nausea and/or vomiting                                      | 7870 | R110  |
| Nausea and/or vomiting                                      |      | R111  |
| Nausea and/or vomiting                                      |      | R112  |
| Nausea and/or vomiting                                      |      | R113  |
| Nausea and/or vomiting                                      |      | R118  |
| Neutropenia                                                 | 2880 | D700  |
| NHL unspecified type                                        | 2028 | C82   |
| NHL unspecified type                                        |      | C83   |
| NHL unspecified type                                        |      | C85   |
| NHL unspecified type                                        |      | C86   |
| Non-infective gastroenteritis and colitis unspecified       | 558  | K529  |
| Other specified medical care                                |      | Z518  |
| Ovarian cancer                                              | 183  | C56   |
| Pain in limb                                                | 7295 | M7960 |

**Appendix to:** Barbera L, Taylor C, Dudgeon D. Why do cancer patients visit the emergency department near the end of life? *CMAJ* 2010. DOI:10.1503/cmaj.091187.

|                                |      |       |
|--------------------------------|------|-------|
| Pain in limb                   |      | M7961 |
| Pain in limb                   |      | M7969 |
| Palliative care                |      | Z515  |
| Pancreatic cancer              | 157  | C25   |
| Phlebitis and thrombophlebitis | 451  | I80   |
| Pleural effusion               | 5119 | J90   |
| Pneumonia                      | 486  | J18   |
| Prostate cancer                | 185  | C61   |
| Renal failure                  | 584  | N17   |
| Renal failure                  | 585  | N18   |
| Renal failure                  | 586  | N19   |
| Retention of urine             | 7882 | R33   |
| Septicemia                     | 038  | A40   |
| Septicemia                     |      | A41   |
| Stomach cancer                 | 151  | C16   |
| Stroke                         | 436  | I64   |
| Stroke                         | 434  |       |
| Syncope and collapse           | 7802 | R55   |
| Thromboembolism                | 1251 | I26   |
| Urinary tract infection        | 5990 | N390  |

**Appendix to:** Barbera L, Taylor C, Dudgeon D. Why do cancer patients visit the emergency department near the end of life? *CMAJ* 2010. DOI:10.1503/cmaj.091187.
